# Supplementary material for: Absolute electron total ionization cross-sections: molecular analogues of DNA and RNA nucleobase and sugar constituents
Source: Royal Society of Chemistry journal article supplement (doi:10.1039/c4cp00490f), 2014-01-01
Supplement: c4cp00490f1.pdf [file c4cp00490f1.pdf]

## Electronic supplementary information:

### Absolute electron-impact total ionization cross-sections: molecular analogues of DNA and RNA nucleobase and sugar constituents

James N. Bull, Jason W. L. Lee, and Claire Vallance

#### 1. Molecular structures for the model species studied experimentally

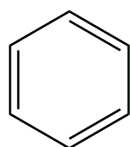

benzene

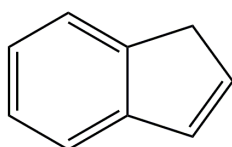

indene

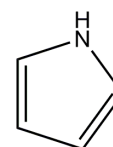

pyrrole

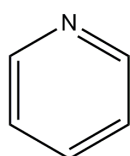

pyridine

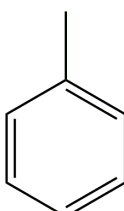

toluene

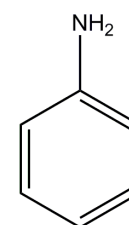

aniline

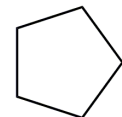

cyclopentane

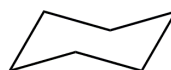

cyclohexane

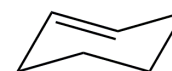

cyclohexene

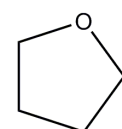

tetrahydrofuran

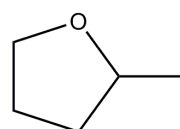

2-methyltetrahydrofuran

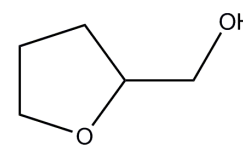

tetrahydrofurfuryl alcohol

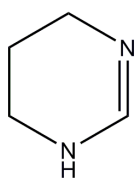

1,4,5,6-tetrahydropyrimidine

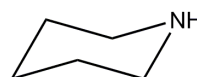

piperidine

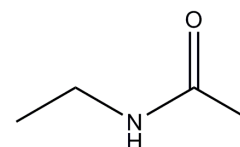

ethyl acetamide

2. Structures for the DNA and RNA constituents

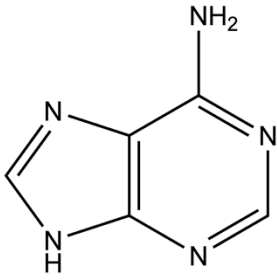

Adenine

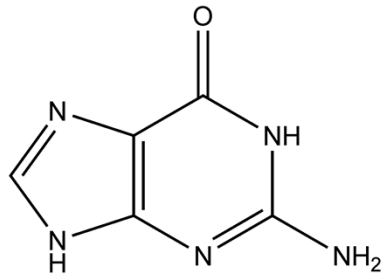

Guanine

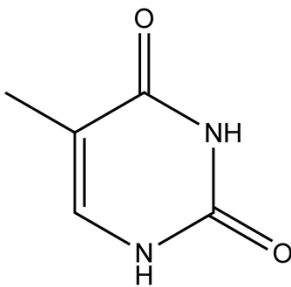

Thymine

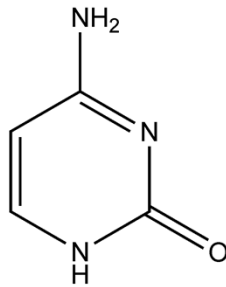

Cytosine

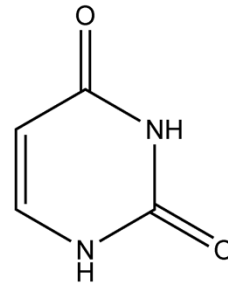

Uracil

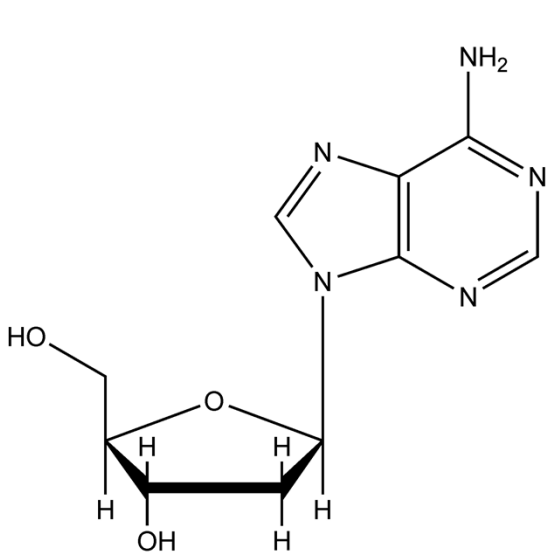

Adenosine

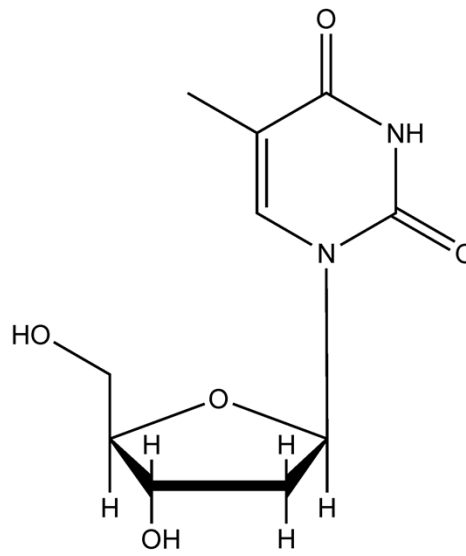

Thymidine

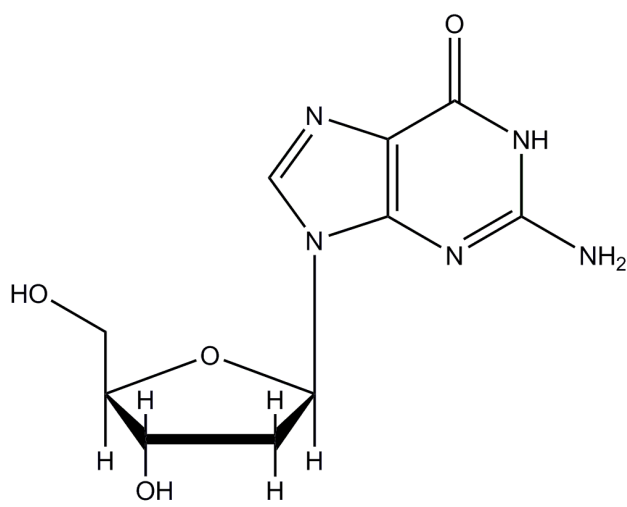

Deoxyguanosine

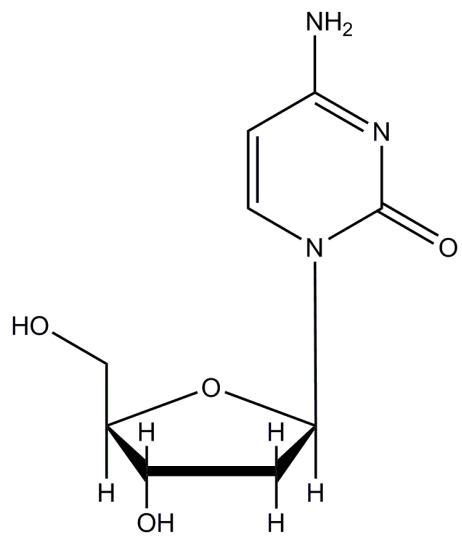

Deoxycytidine

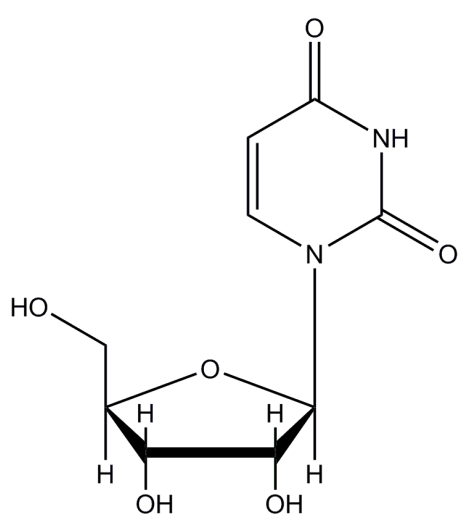

Uridine

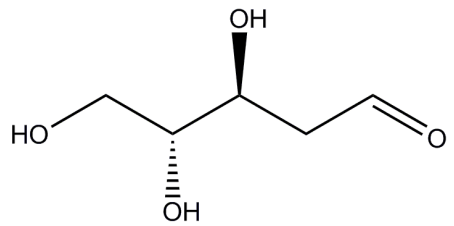

2-deoxy-D-ribose

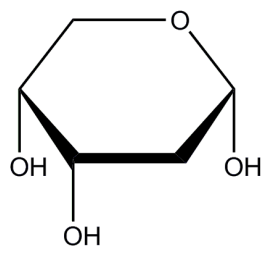

$\alpha$ -D-ribofuranose

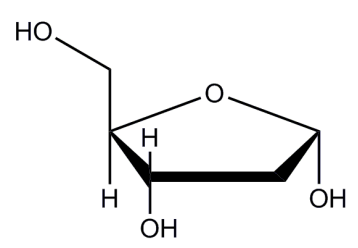

$\alpha$ -D-ribofuranose

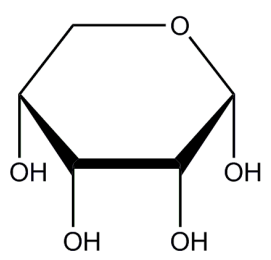

$\alpha$ -D-ribofuranose

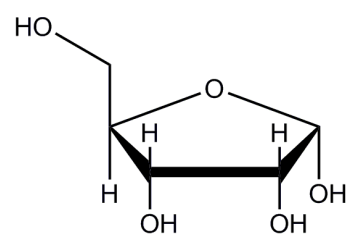

$\alpha$ -D-ribofuranose

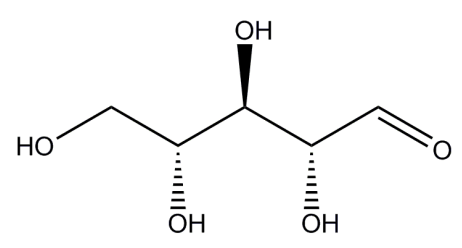

D-ribose

### 3. Total ionization cross section for ethylacetamide

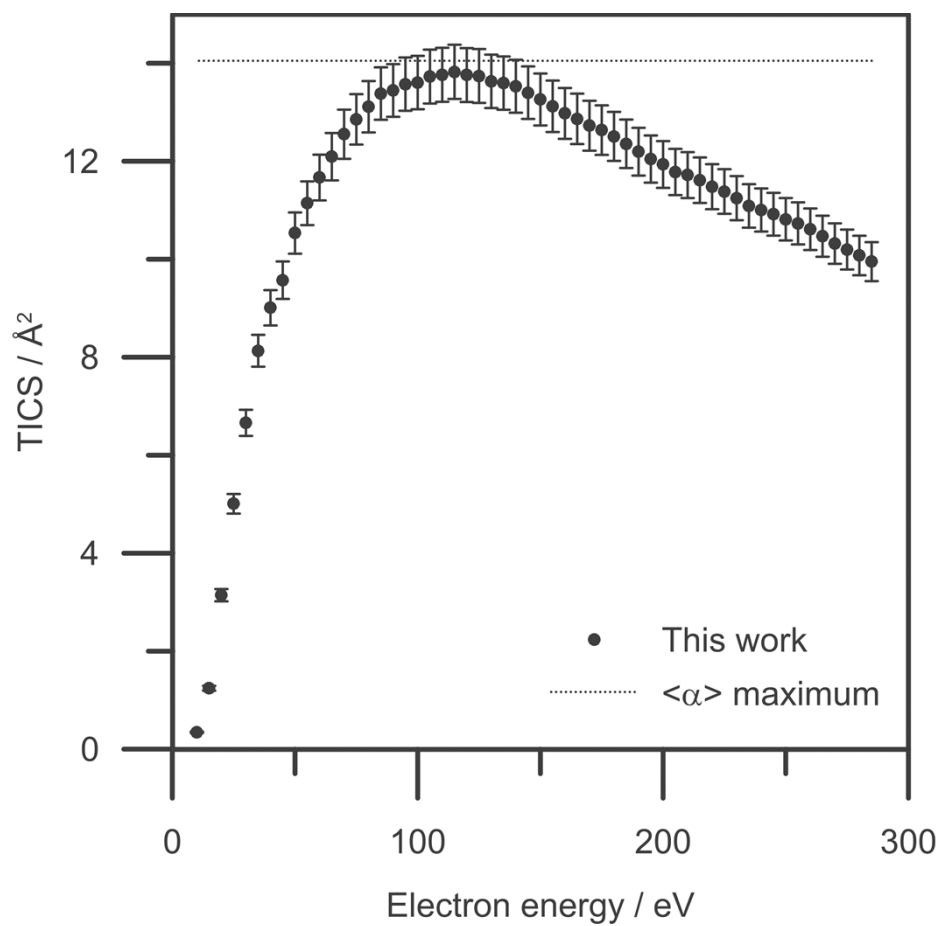

#### 4. Experimentally determined total ionization cross-sections / Å<sup>2</sup>: Aromatic molecules

| EE / eV | indene | toluene | aniline | benzene | pyridine | pyrrole |
|---------|--------|---------|---------|---------|----------|---------|
| 285     | 15.62  | 11.51   | 11.83   | 9.68    | 8.85     | 7.72    |
| 280     | 15.89  | 11.76   | 12.04   | 9.86    | 8.95     | 7.82    |
| 275     | 16.05  | 11.95   | 12.18   | 9.97    | 9.01     | 7.91    |
| 270     | 16.20  | 12.10   | 12.26   | 10.06   | 9.16     | 8.00    |
| 265     | 16.32  | 12.19   | 12.41   | 10.20   | 9.30     | 8.10    |
| 260     | 16.47  | 12.48   | 12.68   | 10.35   | 9.48     | 8.21    |
| 255     | 16.61  | 12.57   | 12.82   | 10.44   | 9.56     | 8.29    |
| 250     | 16.77  | 12.87   | 12.94   | 10.56   | 9.68     | 8.35    |
| 245     | 17.01  | 12.93   | 13.16   | 10.72   | 9.88     | 8.43    |
| 240     | 17.34  | 13.06   | 13.35   | 10.83   | 9.99     | 8.51    |
| 235     | 17.60  | 13.23   | 13.54   | 11.00   | 10.18    | 8.62    |
| 230     | 17.77  | 13.38   | 13.65   | 11.23   | 10.34    | 8.74    |
| 225     | 18.07  | 13.57   | 13.86   | 11.37   | 10.45    | 8.85    |
| 220     | 18.13  | 13.72   | 14.01   | 11.41   | 10.53    | 8.93    |
| 215     | 18.34  | 13.98   | 14.26   | 11.57   | 10.70    | 9.03    |
| 210     | 18.47  | 14.10   | 14.37   | 11.67   | 10.74    | 9.10    |
| 205     | 18.62  | 14.23   | 14.50   | 11.79   | 10.86    | 9.16    |
| 200     | 19.03  | 14.43   | 14.69   | 11.93   | 11.04    | 9.24    |
| 195     | 19.35  | 14.68   | 14.98   | 12.12   | 11.18    | 9.37    |
| 190     | 19.60  | 14.87   | 15.11   | 12.43   | 11.31    | 9.52    |
| 185     | 19.68  | 15.15   | 15.43   | 12.56   | 11.50    | 9.65    |
| 180     | 19.87  | 15.20   | 15.51   | 12.58   | 11.67    | 9.75    |
| 175     | 20.09  | 15.47   | 15.74   | 12.82   | 11.84    | 9.84    |
| 170     | 20.32  | 15.68   | 15.90   | 13.15   | 11.89    | 9.91    |
| 165     | 20.51  | 16.05   | 16.09   | 13.26   | 12.16    | 10.02   |
| 160     | 20.58  | 16.18   | 16.17   | 13.56   | 12.40    | 10.17   |
| 155     | 20.62  | 16.42   | 16.42   | 13.62   | 12.50    | 10.34   |
| 150     | 20.84  | 16.54   | 16.64   | 13.69   | 12.70    | 10.43   |
| 145     | 21.10  | 16.77   | 16.91   | 13.98   | 13.00    | 10.54   |
| 140     | 21.33  | 16.95   | 16.93   | 14.15   | 13.17    | 10.68   |
| 135     | 21.47  | 17.15   | 17.03   | 14.14   | 13.26    | 10.89   |
| 130     | 21.72  | 17.25   | 17.20   | 14.23   | 13.44    | 10.98   |
| 125     | 21.98  | 17.53   | 17.18   | 14.39   | 13.63    | 11.13   |
| 120     | 22.10  | 17.57   | 17.31   | 14.63   | 13.78    | 11.22   |
| 115     | 22.23  | 17.76   | 17.36   | 14.81   | 13.88    | 11.39   |
| 110     | 22.41  | 17.89   | 17.33   | 14.85   | 14.04    | 11.50   |
| 105     | 22.42  | 17.96   | 17.42   | 14.92   | 14.11    | 11.67   |
| 100     | 22.39  | 17.97   | 17.24   | 14.97   | 14.14    | 11.75   |
| 95      | 22.54  | 18.05   | 17.03   | 15.01   | 14.20    | 11.84   |
| 90      | 22.60  | 18.13   | 16.95   | 14.98   | 14.16    | 11.96   |
| 85      | 22.65  | 18.00   | 16.68   | 15.05   | 14.04    | 11.98   |
| 80      | 22.69  | 18.03   | 16.42   | 14.91   | 14.00    | 12.00   |
| 75      | 22.67  | 17.76   | 15.90   | 14.94   | 13.78    | 11.95   |
| 70      | 22.54  | 17.50   | 15.34   | 14.60   | 13.59    | 11.92   |
| 65      | 22.10  | 17.31   | 14.99   | 14.39   | 13.31    | 11.77   |
| 60      | 21.77  | 16.91   | 14.54   | 13.98   | 13.10    | 11.55   |
| 55      | 21.47  | 16.44   | 13.54   | 13.80   | 12.60    | 11.39   |
| 50      | 20.74  | 15.80   | 13.03   | 13.07   | 12.13    | 10.95   |
| 45      | 20.02  | 15.11   | 12.18   | 12.82   | 11.85    | 10.63   |
| 40      | 19.23  | 14.55   | 11.13   | 12.01   | 11.13    | 10.12   |
| 35      | 18.27  | 12.79   | 10.27   | 10.88   | 10.02    | 9.29    |
| 30      | 16.78  | 11.32   | 9.03    | 9.65    | 8.50     | 8.43    |
| 25      | 14.57  | 8.94    | 7.30    | 7.04    | 6.30     | 6.74    |
| 20      | 11.57  | 5.14    | 4.74    | 3.95    | 3.36     | 5.53    |
| 15      | 6.74   | 1.58    | 1.80    | 1.12    | 1.21     | 2.54    |
| 10      | 1.38   | 0.42    | 0.60    | 0.18    | 0.56     | 0.80    |

## 5. Experimentally determined total ionization cross-sections / Å<sup>2</sup>: non-aromatic cyclic molecules

| EE / eV | tetrahydro-<br>furfuryl<br>alcohol | piperidine | 1,4,5,6-<br>tetrahydro-<br>pyrimidine | 2-methyl-<br>tetrahydro-<br>furan | tetrahydro-<br>furan |
|---------|------------------------------------|------------|---------------------------------------|-----------------------------------|----------------------|
| 285     | 9.81                               | 10.26      | 8.91                                  | 8.21                              | 7.42                 |
| 280     | 10.01                              | 10.40      | 9.02                                  | 8.35                              | 7.57                 |
| 275     | 10.14                              | 10.53      | 9.13                                  | 8.43                              | 7.67                 |
| 270     | 10.20                              | 10.62      | 9.23                                  | 8.50                              | 7.71                 |
| 265     | 10.40                              | 10.75      | 9.35                                  | 8.58                              | 7.86                 |
| 260     | 10.56                              | 10.89      | 9.48                                  | 8.75                              | 7.98                 |
| 255     | 10.73                              | 10.99      | 9.57                                  | 8.82                              | 8.11                 |
| 250     | 10.85                              | 11.05      | 9.64                                  | 8.91                              | 8.21                 |
| 245     | 11.09                              | 11.18      | 9.72                                  | 8.99                              | 8.39                 |
| 240     | 11.25                              | 11.28      | 9.82                                  | 9.12                              | 8.51                 |
| 235     | 11.26                              | 11.35      | 9.95                                  | 9.18                              | 8.51                 |
| 230     | 11.50                              | 11.52      | 10.09                                 | 9.26                              | 8.70                 |
| 225     | 11.63                              | 11.66      | 10.22                                 | 9.29                              | 8.79                 |
| 220     | 11.70                              | 11.71      | 10.31                                 | 9.44                              | 8.85                 |
| 215     | 11.88                              | 11.91      | 10.42                                 | 9.60                              | 8.98                 |
| 210     | 11.99                              | 11.99      | 10.50                                 | 9.71                              | 9.07                 |
| 205     | 12.06                              | 12.05      | 10.57                                 | 9.82                              | 9.12                 |
| 200     | 12.19                              | 12.21      | 10.67                                 | 9.94                              | 9.22                 |
| 195     | 12.31                              | 12.36      | 10.81                                 | 9.99                              | 9.30                 |
| 190     | 12.38                              | 12.56      | 10.99                                 | 10.07                             | 9.36                 |
| 185     | 12.43                              | 12.67      | 11.14                                 | 10.19                             | 9.40                 |
| 180     | 12.71                              | 12.81      | 11.25                                 | 10.31                             | 9.61                 |
| 175     | 12.80                              | 12.93      | 11.36                                 | 10.42                             | 9.68                 |
| 170     | 13.00                              | 13.09      | 11.44                                 | 10.44                             | 9.83                 |
| 165     | 13.10                              | 13.26      | 11.56                                 | 10.65                             | 9.91                 |
| 160     | 13.33                              | 13.31      | 11.74                                 | 10.76                             | 10.08                |
| 155     | 13.47                              | 13.48      | 11.93                                 | 10.93                             | 10.19                |
| 150     | 13.59                              | 13.61      | 12.04                                 | 11.02                             | 10.28                |
| 145     | 13.70                              | 13.73      | 12.16                                 | 11.12                             | 10.36                |
| 140     | 13.69                              | 13.92      | 12.32                                 | 11.28                             | 10.35                |
| 135     | 14.02                              | 14.03      | 12.56                                 | 11.38                             | 10.60                |
| 130     | 14.22                              | 14.12      | 12.67                                 | 11.50                             | 10.75                |
| 125     | 14.20                              | 14.22      | 12.84                                 | 11.58                             | 10.73                |
| 120     | 14.36                              | 14.38      | 12.94                                 | 11.77                             | 10.86                |
| 115     | 14.57                              | 14.42      | 13.02                                 | 11.89                             | 11.01                |
| 110     | 14.65                              | 14.55      | 13.27                                 | 11.95                             | 11.08                |
| 105     | 14.86                              | 14.70      | 13.47                                 | 12.06                             | 11.23                |
| 100     | 14.98                              | 14.71      | 13.56                                 | 12.17                             | 11.33                |
| 95      | 15.08                              | 14.86      | 13.80                                 | 12.22                             | 11.40                |
| 90      | 15.15                              | 14.93      | 13.80                                 | 12.24                             | 11.45                |
| 85      | 15.32                              | 15.02      | 13.96                                 | 12.25                             | 11.58                |
| 80      | 15.27                              | 15.10      | 13.85                                 | 12.27                             | 11.55                |
| 75      | 15.26                              | 15.10      | 13.78                                 | 12.26                             | 11.54                |
| 70      | 15.05                              | 15.11      | 13.83                                 | 12.22                             | 11.38                |
| 65      | 15.17                              | 15.06      | 13.71                                 | 12.19                             | 11.47                |
| 60      | 14.90                              | 14.97      | 13.59                                 | 12.04                             | 11.27                |
| 55      | 14.66                              | 14.78      | 13.46                                 | 11.78                             | 11.08                |
| 50      | 14.26                              | 14.47      | 13.21                                 | 11.57                             | 10.78                |
| 45      | 13.90                              | 13.99      | 12.73                                 | 11.34                             | 10.51                |
| 40      | 13.35                              | 13.53      | 12.31                                 | 10.73                             | 10.09                |
| 35      | 12.66                              | 12.49      | 11.42                                 | 10.27                             | 9.57                 |
| 30      | 11.02                              | 11.53      | 10.29                                 | 8.94                              | 8.34                 |
| 25      | 9.69                               | 10.04      | 7.88                                  | 7.87                              | 7.33                 |
| 20      | 7.41                               | 8.51       | 4.37                                  | 6.00                              | 5.61                 |
| 15      | 3.94                               | 5.36       | 1.42                                  | 3.18                              | 2.98                 |
| 10      | 0.74                               | 0.95       | 0.29                                  | 0.61                              | 0.56                 |

## 6. Experimentally determined total ionization cross-sections / Å<sup>2</sup>: hydrocarbons

| EE / eV | hexane | cyclohexane | cyclohexene | cyclopentane |
|---------|--------|-------------|-------------|--------------|
| 285     | 11.68  | 10.79       | 10.10       | 8.93         |
| 280     | 11.75  | 10.92       | 10.28       | 9.05         |
| 275     | 11.79  | 11.05       | 10.45       | 9.18         |
| 270     | 11.98  | 11.20       | 10.54       | 9.32         |
| 265     | 12.07  | 11.37       | 10.70       | 9.45         |
| 260     | 12.19  | 11.41       | 10.89       | 9.58         |
| 255     | 12.35  | 11.54       | 11.01       | 9.69         |
| 250     | 12.51  | 11.62       | 11.17       | 9.77         |
| 245     | 12.59  | 11.84       | 11.22       | 9.89         |
| 240     | 12.83  | 11.91       | 11.39       | 9.95         |
| 235     | 12.90  | 11.99       | 11.59       | 10.05        |
| 230     | 12.90  | 12.13       | 11.72       | 10.23        |
| 225     | 13.11  | 12.26       | 11.88       | 10.32        |
| 220     | 13.29  | 12.36       | 11.91       | 10.44        |
| 215     | 13.40  | 12.45       | 12.09       | 10.56        |
| 210     | 13.48  | 12.55       | 12.20       | 10.69        |
| 205     | 13.60  | 12.71       | 12.26       | 10.77        |
| 200     | 13.77  | 12.89       | 12.47       | 10.92        |
| 195     | 13.96  | 13.07       | 12.63       | 11.03        |
| 190     | 14.15  | 13.20       | 12.89       | 11.16        |
| 185     | 14.23  | 13.36       | 13.04       | 11.38        |
| 180     | 14.45  | 13.53       | 13.15       | 11.47        |
| 175     | 14.66  | 13.68       | 13.30       | 11.60        |
| 170     | 14.80  | 13.82       | 13.49       | 11.72        |
| 165     | 15.00  | 13.95       | 13.76       | 11.91        |
| 160     | 15.02  | 14.08       | 13.85       | 12.00        |
| 155     | 15.26  | 14.21       | 14.02       | 12.16        |
| 150     | 15.28  | 14.36       | 14.12       | 12.06        |
| 145     | 15.59  | 14.53       | 14.44       | 12.20        |
| 140     | 15.80  | 14.75       | 14.58       | 12.39        |
| 135     | 16.04  | 14.91       | 14.65       | 12.52        |
| 130     | 16.08  | 15.03       | 14.73       | 12.62        |
| 125     | 16.31  | 15.12       | 14.90       | 12.70        |
| 120     | 16.53  | 15.36       | 15.17       | 12.89        |
| 115     | 16.69  | 15.48       | 15.26       | 13.00        |
| 110     | 16.72  | 15.58       | 15.35       | 13.08        |
| 105     | 16.94  | 15.72       | 15.37       | 13.20        |
| 100     | 16.94  | 15.77       | 15.46       | 13.24        |
| 95      | 17.02  | 15.78       | 15.50       | 13.25        |
| 90      | 16.93  | 15.85       | 15.41       | 13.31        |
| 85      | 16.93  | 15.91       | 15.50       | 13.36        |
| 80      | 16.83  | 15.83       | 15.30       | 13.29        |
| 75      | 16.70  | 15.82       | 15.21       | 13.29        |
| 70      | 16.50  | 15.71       | 15.04       | 13.19        |
| 65      | 16.12  | 15.60       | 14.77       | 13.10        |
| 60      | 15.81  | 15.23       | 14.28       | 12.79        |
| 55      | 15.44  | 14.96       | 13.70       | 12.56        |
| 50      | 15.02  | 14.41       | 13.08       | 12.10        |
| 45      | 14.27  | 13.62       | 12.64       | 11.38        |
| 40      | 13.52  | 12.84       | 11.39       | 10.39        |
| 35      | 12.28  | 11.87       | 10.63       | 9.46         |
| 30      | 11.07  | 10.39       | 8.85        | 8.06         |
| 25      | 8.81   | 8.66        | 7.29        | 5.94         |
| 20      | 5.44   | 5.20        | 4.36        | 3.65         |
| 15      | 2.13   | 2.05        | 1.53        | 1.34         |
| 10      | 0.49   | 0.44        | 0.16        | 0.27         |

## 7. Experimentally determined total ionization cross-sections / Å<sup>2</sup>: water and ethylacetamide

| EE / eV | water | ethylacetamide |
|---------|-------|----------------|
| 285     | 1.61  | 9.95           |
| 280     | 1.63  | 10.08          |
| 275     | 1.65  | 10.20          |
| 270     | 1.69  | 10.32          |
| 265     | 1.70  | 10.47          |
| 260     | 1.72  | 10.61          |
| 255     | 1.73  | 10.73          |
| 250     | 1.74  | 10.82          |
| 245     | 1.74  | 10.92          |
| 240     | 1.76  | 11.00          |
| 235     | 1.77  | 11.09          |
| 230     | 1.79  | 11.25          |
| 225     | 1.80  | 11.38          |
| 220     | 1.82  | 11.48          |
| 215     | 1.86  | 11.61          |
| 210     | 1.85  | 11.72          |
| 205     | 1.88  | 11.78          |
| 200     | 1.90  | 11.93          |
| 195     | 1.90  | 12.04          |
| 190     | 1.91  | 12.19          |
| 185     | 1.95  | 12.36          |
| 180     | 1.96  | 12.51          |
| 175     | 1.99  | 12.63          |
| 170     | 1.98  | 12.72          |
| 165     | 2.00  | 12.86          |
| 160     | 2.01  | 12.98          |
| 155     | 2.02  | 13.12          |
| 150     | 2.06  | 13.26          |
| 145     | 2.07  | 13.40          |
| 140     | 2.07  | 13.53          |
| 135     | 2.10  | 13.59          |
| 130     | 2.10  | 13.63          |
| 125     | 2.12  | 13.74          |
| 120     | 2.13  | 13.76          |
| 115     | 2.13  | 13.82          |
| 110     | 2.13  | 13.76          |
| 105     | 2.15  | 13.73          |
| 100     | 2.15  | 13.61          |
| 95      | 2.13  | 13.57          |
| 90      | 2.12  | 13.44          |
| 85      | 2.09  | 13.38          |
| 80      | 2.09  | 13.11          |
| 75      | 2.08  | 12.85          |
| 70      | 2.01  | 12.55          |
| 65      | 1.97  | 12.09          |
| 60      | 1.87  | 11.67          |
| 55      | 1.83  | 11.14          |
| 50      | 1.73  | 10.53          |
| 45      | 1.67  | 9.57           |
| 40      | 1.54  | 9.01           |
| 35      | 1.37  | 8.13           |
| 30      | 1.16  | 6.66           |
| 25      | 0.94  | 5.01           |
| 20      | 0.66  | 3.14           |
| 15      | 0.27  | 1.24           |
| 10      | 0.07  | 0.34           |



8. **Total ionization cross sections calculated using the BEB model / Å<sup>2</sup>: DNA/RNA constituents**

| EE / eV | guanine | adenine | thymine | cytosine | uracil | α-D-ribo-furanose | α-D-ribo-pyranose | α-deoxy-D-ribo-furanose | α-deoxy-D-ribo-pyranose |
|---------|---------|---------|---------|----------|--------|-------------------|-------------------|-------------------------|-------------------------|
| 205     | 18.59   | 17.30   | 15.26   | 13.96    | 12.91  | 15.25             | 15.02             | 14.37                   | 14.04                   |
| 200     | 18.83   | 17.53   | 15.46   | 14.14    | 13.07  | 15.41             | 15.18             | 14.53                   | 14.20                   |
| 195     | 19.10   | 17.78   | 15.67   | 14.34    | 13.25  | 15.56             | 15.33             | 14.68                   | 14.34                   |
| 190     | 19.35   | 18.03   | 15.88   | 14.53    | 13.42  | 15.72             | 15.48             | 14.83                   | 14.49                   |
| 185     | 19.59   | 18.26   | 16.07   | 14.70    | 13.58  | 15.86             | 15.62             | 14.96                   | 14.62                   |
| 180     | 19.70   | 18.37   | 16.16   | 14.79    | 13.65  | 16.04             | 15.80             | 15.14                   | 14.79                   |
| 175     | 19.95   | 18.61   | 16.36   | 14.97    | 13.81  | 16.16             | 15.92             | 15.26                   | 14.90                   |
| 170     | 20.15   | 18.80   | 16.51   | 15.12    | 13.94  | 16.32             | 16.08             | 15.42                   | 15.06                   |
| 165     | 20.40   | 19.05   | 16.71   | 15.31    | 14.10  | 16.48             | 16.23             | 15.57                   | 15.21                   |
| 160     | 20.61   | 19.25   | 16.88   | 15.46    | 14.24  | 16.62             | 16.37             | 15.72                   | 15.34                   |
| 155     | 20.78   | 19.42   | 17.01   | 15.59    | 14.34  | 16.78             | 16.53             | 15.87                   | 15.50                   |
| 150     | 20.95   | 19.59   | 17.14   | 15.71    | 14.45  | 16.86             | 16.60             | 15.95                   | 15.57                   |
| 145     | 21.23   | 19.86   | 17.37   | 15.92    | 14.63  | 17.00             | 16.74             | 16.09                   | 15.71                   |
| 140     | 21.40   | 20.03   | 17.50   | 16.04    | 14.73  | 17.11             | 16.85             | 16.20                   | 15.81                   |
| 135     | 21.52   | 20.16   | 17.59   | 16.13    | 14.80  | 17.31             | 17.04             | 16.39                   | 16.00                   |
| 130     | 21.66   | 20.31   | 17.69   | 16.23    | 14.88  | 17.42             | 17.15             | 16.50                   | 16.10                   |
| 125     | 21.83   | 20.48   | 17.82   | 16.36    | 14.98  | 17.46             | 17.19             | 16.56                   | 16.16                   |
| 120     | 21.95   | 20.61   | 17.91   | 16.44    | 15.04  | 17.62             | 17.35             | 16.72                   | 16.31                   |
| 115     | 22.07   | 20.74   | 18.00   | 16.53    | 15.11  | 17.70             | 17.43             | 16.81                   | 16.39                   |
| 110     | 22.13   | 20.81   | 18.03   | 16.57    | 15.12  | 17.78             | 17.50             | 16.89                   | 16.47                   |
| 105     | 22.17   | 20.87   | 18.05   | 16.60    | 15.13  | 17.88             | 17.60             | 17.00                   | 16.57                   |
| 100     | 22.08   | 20.81   | 17.96   | 16.53    | 15.04  | 17.90             | 17.61             | 17.02                   | 16.59                   |
| 95      | 22.03   | 20.78   | 17.90   | 16.48    | 14.98  | 17.92             | 17.63             | 17.06                   | 16.62                   |
| 90      | 21.95   | 20.74   | 17.82   | 16.42    | 14.90  | 17.87             | 17.58             | 17.02                   | 16.58                   |
| 85      | 21.75   | 20.57   | 17.63   | 16.26    | 14.73  | 17.89             | 17.60             | 17.06                   | 16.61                   |
| 80      | 21.54   | 20.40   | 17.44   | 16.10    | 14.55  | 17.71             | 17.41             | 16.90                   | 16.45                   |
| 75      | 21.16   | 20.08   | 17.11   | 15.81    | 14.25  | 17.55             | 17.25             | 16.77                   | 16.32                   |
| 70      | 20.67   | 19.65   | 16.69   | 15.44    | 13.88  | 17.30             | 17.00             | 16.55                   | 16.09                   |
| 65      | 20.17   | 19.21   | 16.25   | 15.06    | 13.50  | 17.08             | 16.77             | 16.35                   | 15.89                   |
| 60      | 19.55   | 18.67   | 15.72   | 14.59    | 13.03  | 16.60             | 16.30             | 15.92                   | 15.46                   |
| 55      | 18.77   | 17.97   | 15.04   | 14.00    | 12.45  | 16.11             | 15.80             | 15.47                   | 15.01                   |
| 50      | 17.82   | 17.11   | 14.23   | 13.29    | 11.75  | 15.42             | 15.12             | 14.84                   | 14.37                   |
| 45      | 16.94   | 16.33   | 13.47   | 12.63    | 11.09  | 14.61             | 14.30             | 14.08                   | 13.62                   |
| 40      | 15.74   | 15.24   | 12.43   | 11.73    | 10.21  | 13.54             | 13.23             | 13.08                   | 12.62                   |
| 35      | 14.11   | 13.74   | 11.04   | 10.51    | 9.03   | 12.32             | 12.01             | 11.93                   | 11.48                   |
| 30      | 12.28   | 12.05   | 9.49    | 9.15     | 7.73   | 10.54             | 10.24             | 10.24                   | 9.79                    |
| 25      | 9.51    | 9.42    | 7.14    | 7.07     | 5.80   | 8.39              | 8.09              | 8.18                    | 7.75                    |
| 20      | 5.85    | 5.93    | 4.15    | 4.36     | 3.34   | 5.22              | 4.97              | 5.12                    | 4.76                    |
| 15      | 2.38    | 2.50    | 1.36    | 1.76     | 1.14   | 1.98              | 1.78              | 1.95                    | 1.68                    |
| 10      | 0.23    | 0.28    | 0.06    | 0.13     | 0.01   | 0.01              | 0.01              | 0.01                    | 0.01                    |
